# Supplementary material
Source: PubMed Central journal article supplement (PMC4135954)
Supplement: JVI.01237-14_zjv999099291so1.pdf [file JVI.01237-14_zjv999099291so1.pdf]

**Supplemental Table 1.** Summary of the number of R5 SHIV-infected macaques with immunodeficiency within each subtype and the proportion of SHIVE within the immunodeficient cohort.

| R5 SHIV | Clade | Route of inoculation | # Infected Animals | # Animals with AIDS (%) | # AIDS animals with SHIVE (%) |
|---------|-------|----------------------|--------------------|-------------------------|-------------------------------|
| 162P3N  | B     | IV                   | 9                  | 8 (88.9)                | 2 (25)                        |
|         |       | IR                   | 17                 | 13 (76.5)               | 4 (30.8)                      |
|         |       | IVG                  | 17                 | 5 (29.4)                | 1 (20)                        |
| 109P3   | C     | IR                   | 7                  | 1 (14.3)                | 1(100)                        |
| 109P3N  | C     | IR                   | 6                  | 2 (33.3)                | 1 (50)                        |

IV, intravenous; IR, intrarectal; IVG, intravaginal.
